# Supplementary material for: Hydrosilylation and electroreduction of CO2using a zirconocene hydride catalyst
Source: Royal Society of Chemistry journal article supplement (doi:10.1039/d2nj06204f), 2023-01-01

*Supporting Information.*

**Hydrosilylation and electroreduction of CO<sub>2</sub> using a Zirconocene Hydride Catalyst**

Diego A.Roa and Juventino J. García\*

juvent@unam.mx

*Facultad de Química, Universidad Nacional Autónoma de México, Mexico City, 04510,  
Mexico*

**Content**

|                                                                                                                  |     |
|------------------------------------------------------------------------------------------------------------------|-----|
| Figure 1S. MS for Phenylsilane                                                                                   | S2  |
| Figure 2S. MS for Methoxy(phenyl)silane                                                                          | S2  |
| Figure 3S. MS for dimethoxy(phenyl)silane                                                                        | S3  |
| Figure 4S. MS for trimethoxy(phenyl)silane                                                                       | S3  |
| Figure 5S. MS for Metyl-formate                                                                                  | S4  |
| Figure 6S. MS for Methanol                                                                                       | S4  |
| Figure 7S. MS for 1,3-diphenyldisiloxane                                                                         | S5  |
| Figure 8S. Typical GC for crude mixture for CO <sub>2</sub> hydrosilylation reaction                             | S5  |
| Table 1S. Promotors used in the hydrosilylation reaction                                                         | S6  |
| Table 2S. Solvents used in the hydrosilylation reaction                                                          | S7  |
| Table 3S. Hydrosilylation reaction at different pressures                                                        | S8  |
| Quantification of methanol at the optimized reaction                                                             | S9  |
| Hg drop test of the optimized reaction                                                                           | S10 |
| Reaction of CO <sub>2</sub> with [Cp <sub>2</sub> ZrHCl]                                                         | S11 |
| Figure 9S <sup>1</sup> H-NMR of the reaction of CO <sub>2</sub> with [Cp <sub>2</sub> ZrHCl]                     | S12 |
| Figure 10S <sup>13</sup> C-NMR of the reaction of CO <sub>2</sub> with [Cp <sub>2</sub> ZrHCl]                   | S13 |
| Figure 11S Cyclic voltammetry of [Cp <sub>2</sub> ZrHCl] in argon                                                | S14 |
| Figure 12S Cyclic voltammetry of [Cp <sub>2</sub> ZrHCl] with PhB(OH) <sub>2</sub>                               | S14 |
| Figure 13S Cyclic voltammetry of [Cp <sub>2</sub> ZrHCl] with H <sub>2</sub> O                                   | S15 |
| Figure 14S Cyclic voltammetry of [Cp <sub>2</sub> ZrHCl] with AcOH                                               | S15 |
| Figure 15S. FTIR resulting from the reaction of Wilkinson's reagent with the outlet gas of the chronoamperometry | S16 |
| Calculation of Faradic Efficiency                                                                                | S17 |
| Figure 16S. GC for the reaction mixture of chronoamperometry with PhCO <sub>2</sub> H                            | S18 |
| Figure 17S. MS for Formic Acid                                                                                   | S18 |
| Figure 18S. Full spectrum of <sup>1</sup> H-NMR of the reaction of CO <sub>2</sub> with [Cp <sub>2</sub> ZrHCl]  | S19 |
| Figure 19S. Electrochemical control experiments in absence of [Cp <sub>2</sub> ZrHCl]                            | S20 |

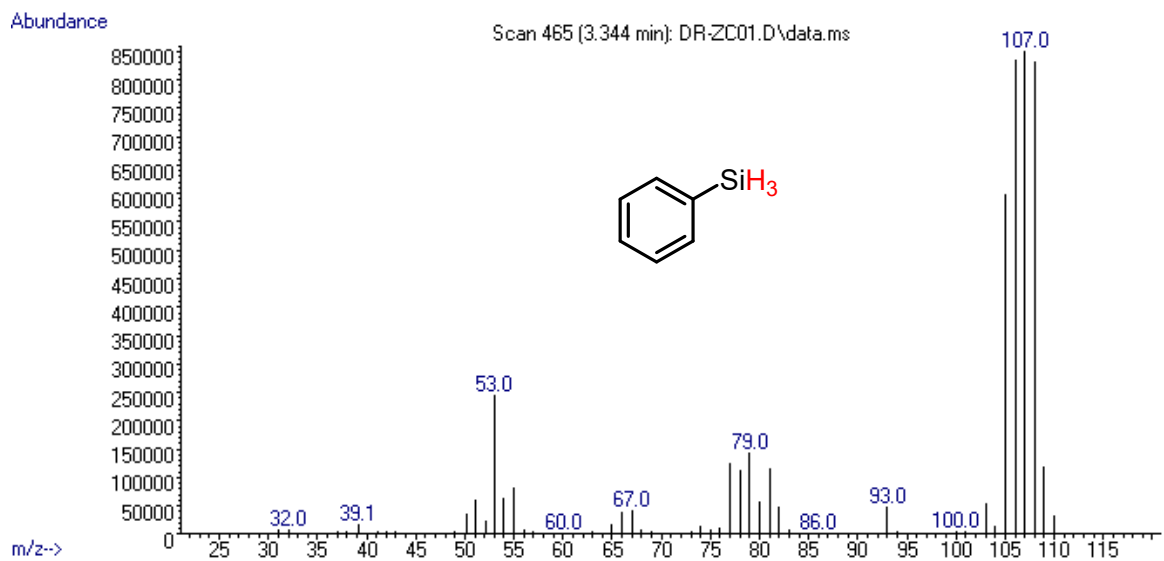

**Figure 1S.** MS for Phenylsilane

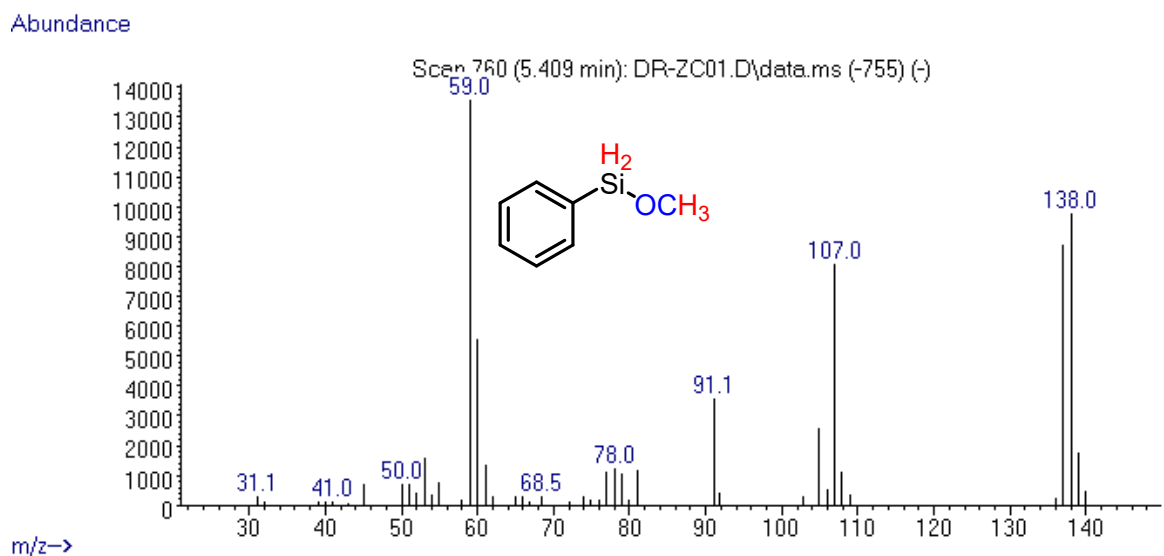

**Figure 2S.** MS for Methoxy(phenyl)silane

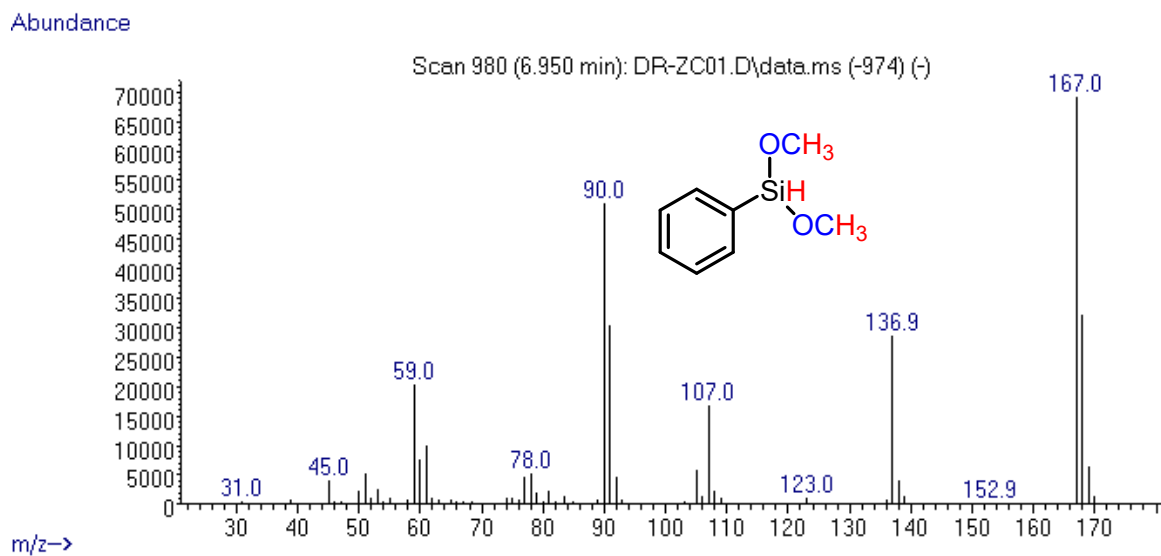

**Figure 3S.** MS for dimethoxy(phenyl)silane

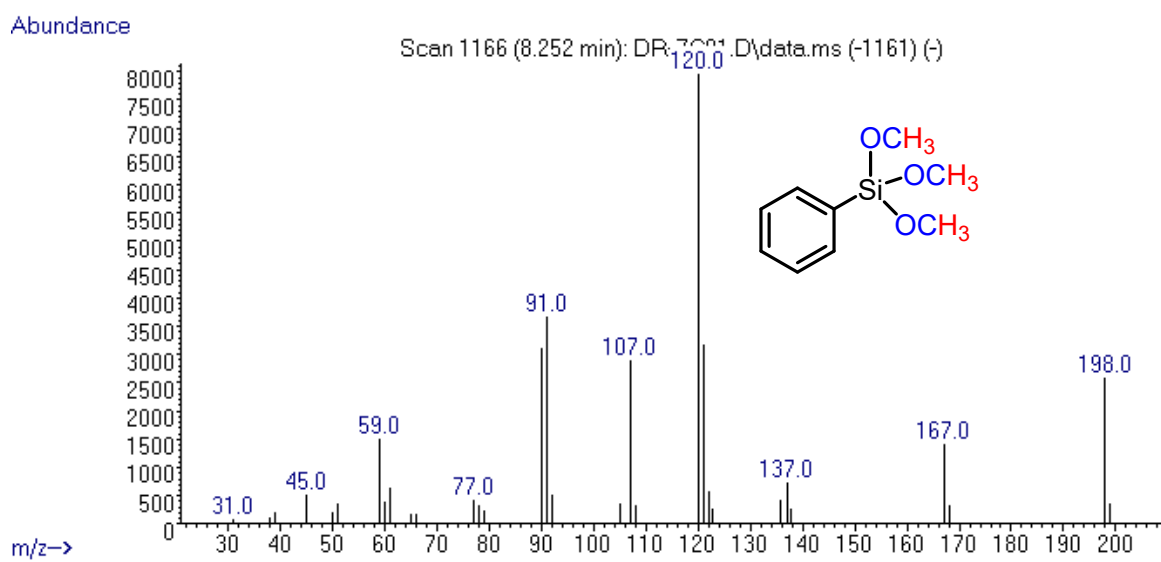

**Figure 4S.** MS for trimethoxy(phenyl)silane

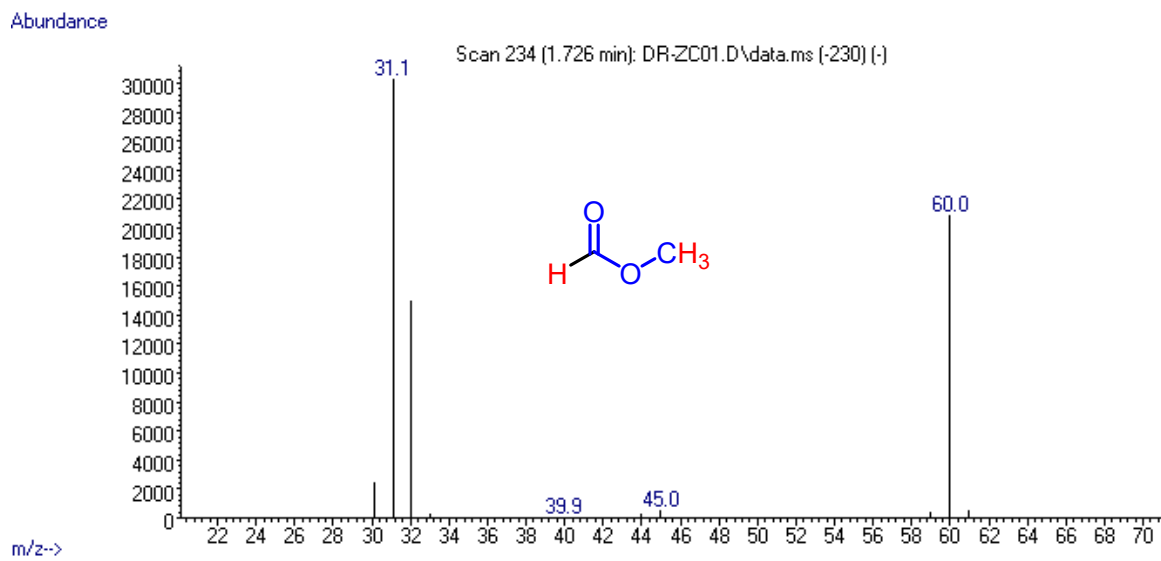

**Figure 5S.** MS for Metyl-formate

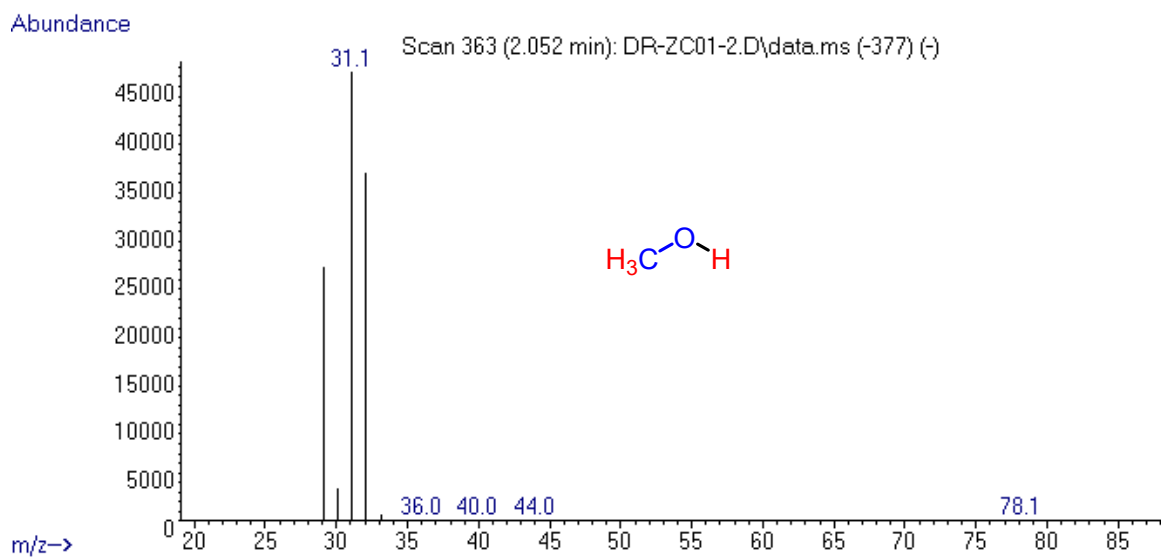

**Figure 6S.** MS for Methanol

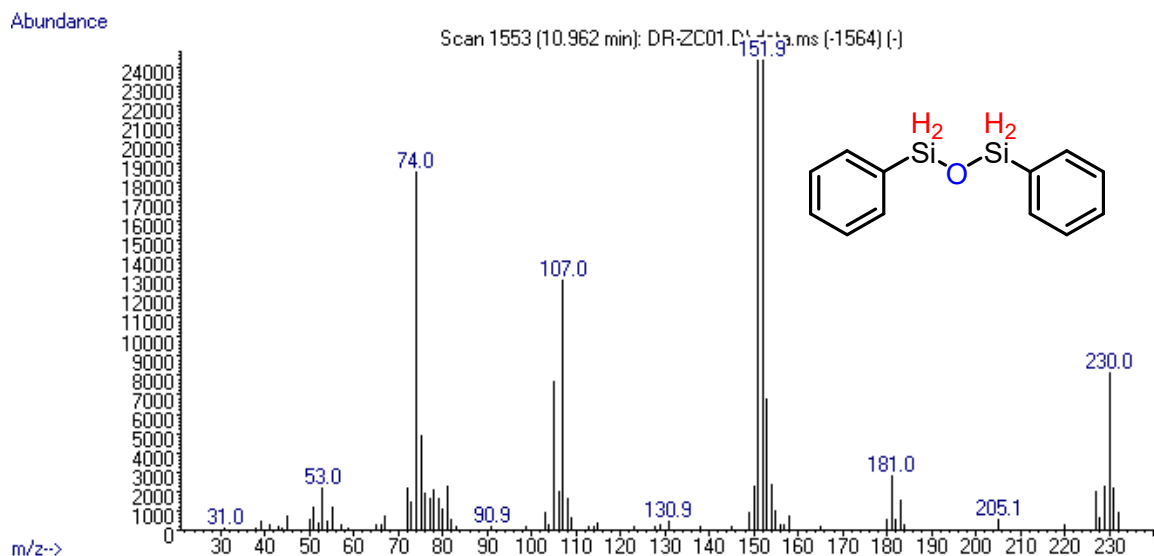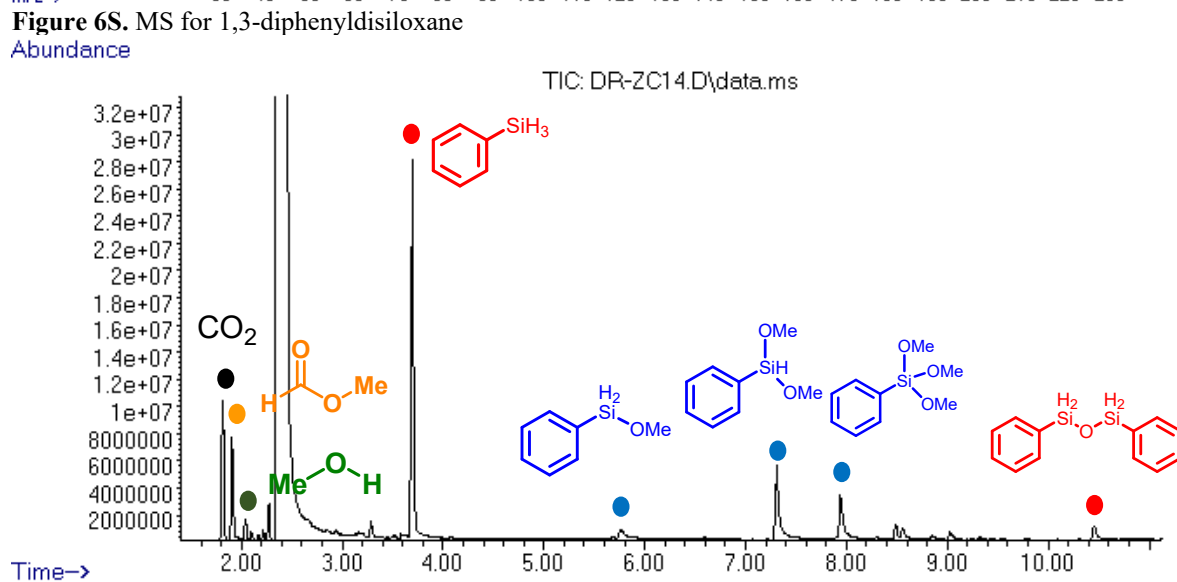

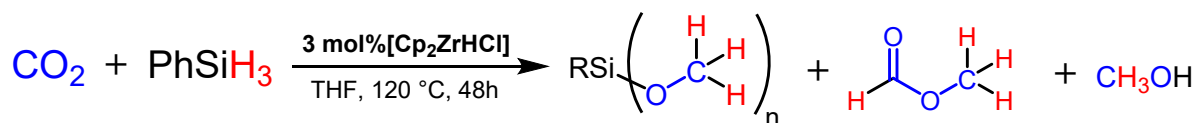

**Table 1S.** Promotors used for CO<sub>2</sub> hydrosilylation reaction<sup>a</sup>

| Entry | Promotor           | %SiOMe | % FM   | % MeOH | % Conv |
|-------|--------------------|--------|--------|--------|--------|
| 1     | KF                 | 31     | 5      | 4      | 40     |
| 2     | TBAF               | nd     | nd     | nd     | >99    |
| 3     | B(Et) <sub>3</sub> | 68     | 8      | 2      | 80     |
| 4     | H <sub>2</sub> O   | nd     | traces | traces | <1     |

<sup>a</sup> Reactions were performed using 0.012 mmol [Cp<sub>2</sub>ZrHCl] with 0.401 mmol PhSiH<sub>3</sub> at 120 °C under 100 psi CO<sub>2</sub>. Yields and conversion were determined by GC-MS

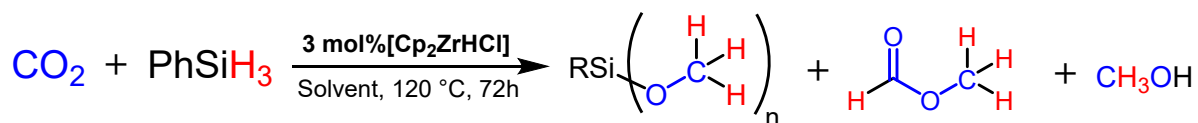

**Table 2S.** Solvents used for CO<sub>2</sub> hydrosilylation reaction<sup>a</sup>

| Entry | Solvent | %SiOMe | % FM | % MeOH | % Conv |
|-------|---------|--------|------|--------|--------|
| 1     | THF     | 92     | 5    | 3      | >99    |
| 2     | Dioxane | 4      | 1    | 0      | 5      |
| 3     | Toluene | nd     | nd   | nd     | 0      |
| 4     | ACN     | nd     | nd   | nd     | >99    |

<sup>a</sup> Reactions were performed using 0.012 mmol [Cp<sub>2</sub>ZrHCl] with 0.401 mmol PhSiH<sub>3</sub> at 120 °C under 100 psi CO<sub>2</sub>. Yields and conversion were determined by GC-MS

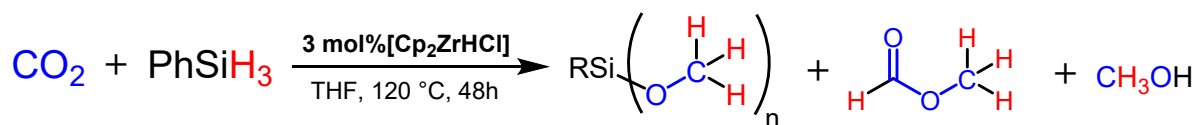

**Table 3S.** Different pressures of CO<sub>2</sub> at the hydrosilylation reaction<sup>a</sup>

| Entry    | CO <sub>2</sub> (psi) | %SiOMe | % FM | % MeOH | % Conv |
|----------|-----------------------|--------|------|--------|--------|
| <b>1</b> | 100                   | 87     | 8    | 2      | 97     |
| <b>2</b> | 80                    | 72     | 25   | 1      | 98     |
| <b>3</b> | 50                    | 27     | 65   | 4      | 96     |

<sup>a</sup> Reactions were performed using 0.012 mmol [Cp<sub>2</sub>ZrHCl] with 0.401 mmol PhSiH<sub>3</sub> at 120 °C for 48 h. Yields and conversion were determined by GC-MS



## Quantification of methanol at the optimized reaction

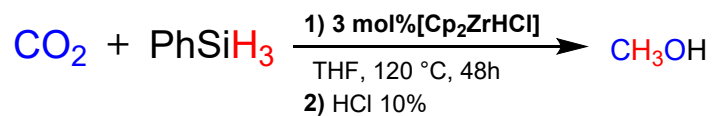

**Table 5S.** Addition of MeOH to the crude reaction

| Addition         | mmol MeOH | Area     |
|------------------|-----------|----------|
| 0                | 0         | 6417951  |
| 20 $\mu\text{L}$ | 0.494     | 8621609  |
| 60 $\mu\text{L}$ | 1.483     | 15539820 |

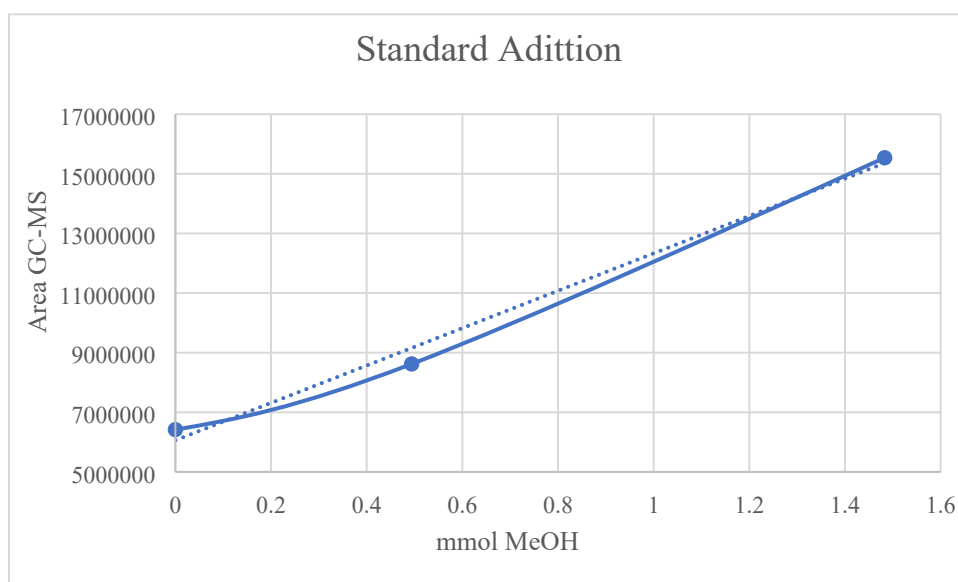

The negative intercept on the x-axis corresponds to the amount of the analyte in the test sample. This value is given by  $b/a$ , the ratio of the intercept and the slope of the regression line.

Moles of MeOH in the crude reaction: 0.031 mmol

$$\%Yield_{\text{MeOH}} = \frac{0.9662 \text{ mmol}}{1.203 \text{ mmol } H^-} \times 100 = 80.31\% \approx 80\%$$

### Hg drop test of the optimized reaction

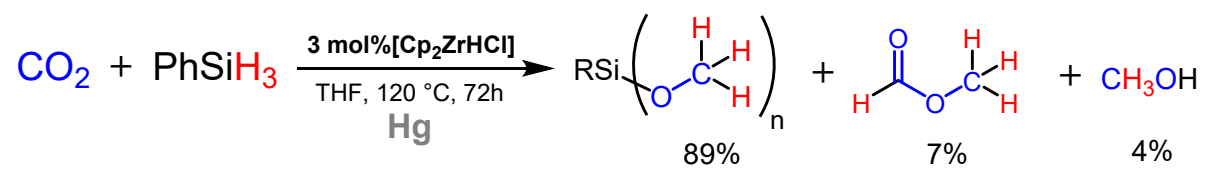

## Reaction of CO<sub>2</sub> with [Cp<sub>2</sub>ZrHCl]

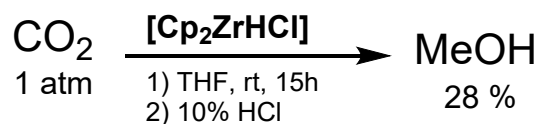

**Table 5S.** Addition of MeOH to the crude reaction

| Addition | mmol MeOH | Area    |
|----------|-----------|---------|
| 0        | 0         | 159584  |
| 20 uL    | 0.494     | 695799  |
| 60 uL    | 1.483     | 2538090 |

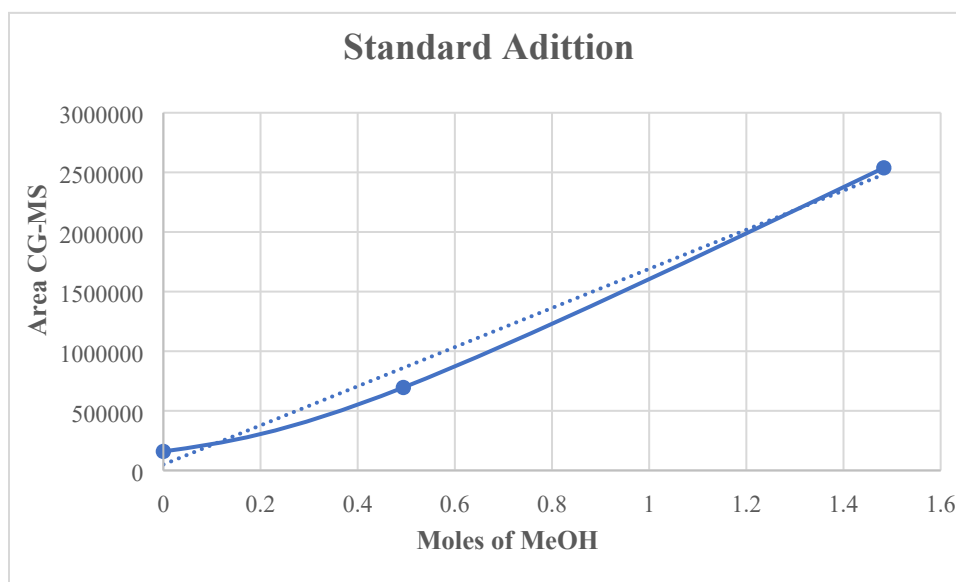

**Graphic 1S.** Addition Standard (MeOH) to the crude reaction

The negative intercept on the x-axis corresponds to the amount of the analyte in the test sample. This value is given by  $b/a$ , the ratio of the intercept and the slope of the regression line.

Moles of MeOH in the crude reaction: 0.031 mmol

$$\%Yield_{\text{MeOH}} = \frac{0.030\text{mmol}}{0.1146\text{mmol}} \times 100 = 26.18\% \approx 26\%$$

**Figure 9S.**  $^1\text{H-NMR}$  of the reaction of  $\text{CO}_2$  with  $[\text{Cp}_2\text{ZrHCl}]$

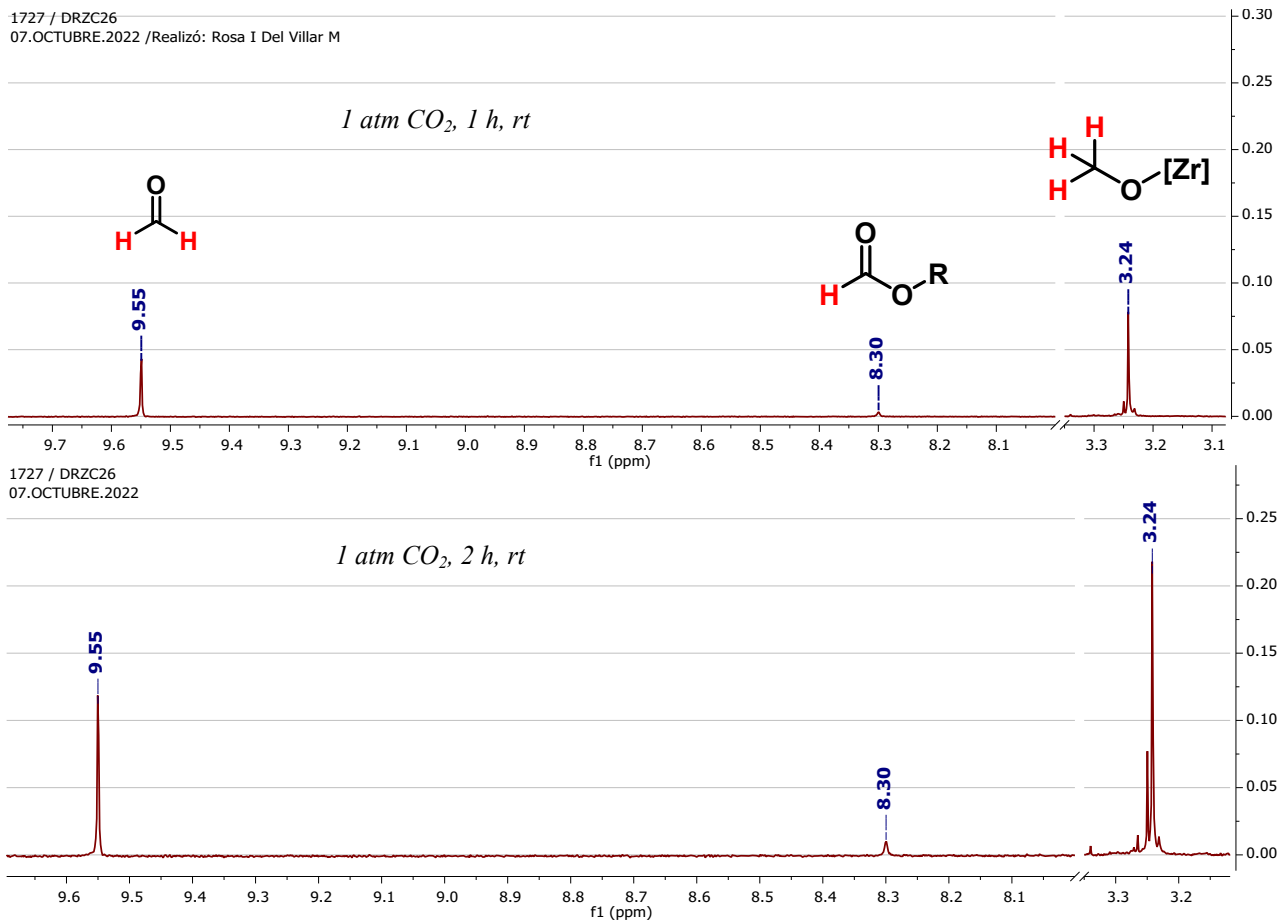

**Figure 10S.**  $^{13}\text{C}$ -NMR of the reaction of  $\text{CO}_2$  with  $[\text{Cp}_2\text{ZrHCl}]$

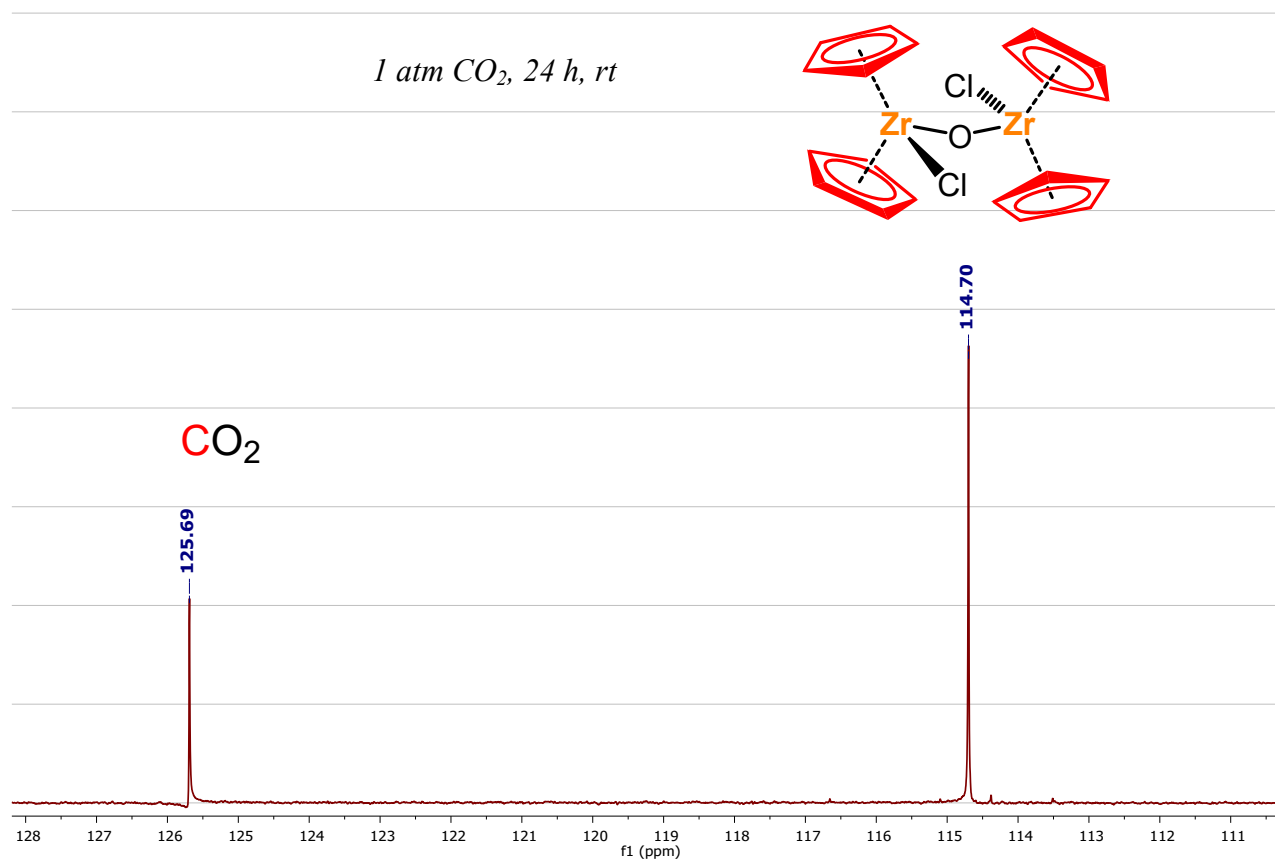

**Figure 11S.** Cyclic voltammetry of  $[\text{Cp}_2\text{ZrHCl}]$  in argon

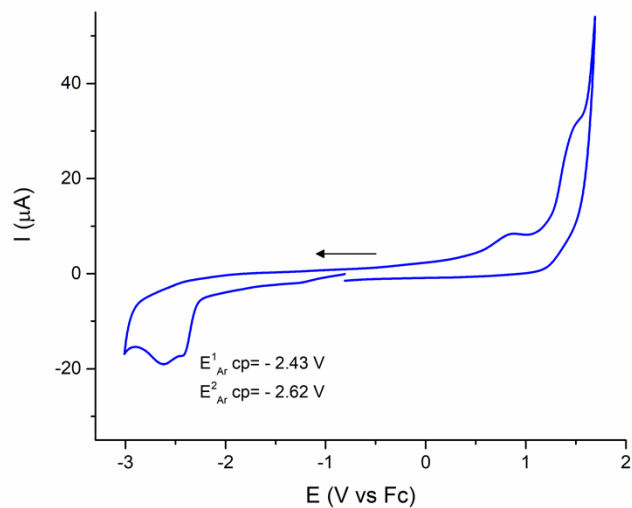

**Figure 12S.** Cyclic voltammetry of  $[\text{Cp}_2\text{ZrHCl}]$  with  $\text{PhB}(\text{OH})_2$

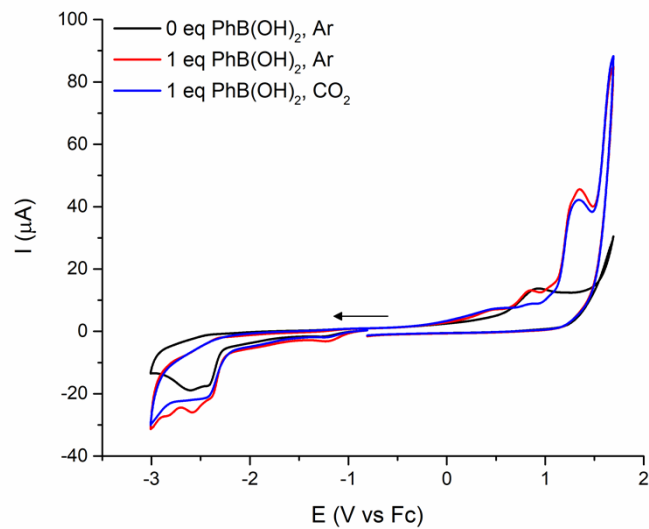

**Figure 13S** Cyclic voltammetry of  $[\text{Cp}_2\text{ZrHCl}]$  with  $\text{H}_2\text{O}$

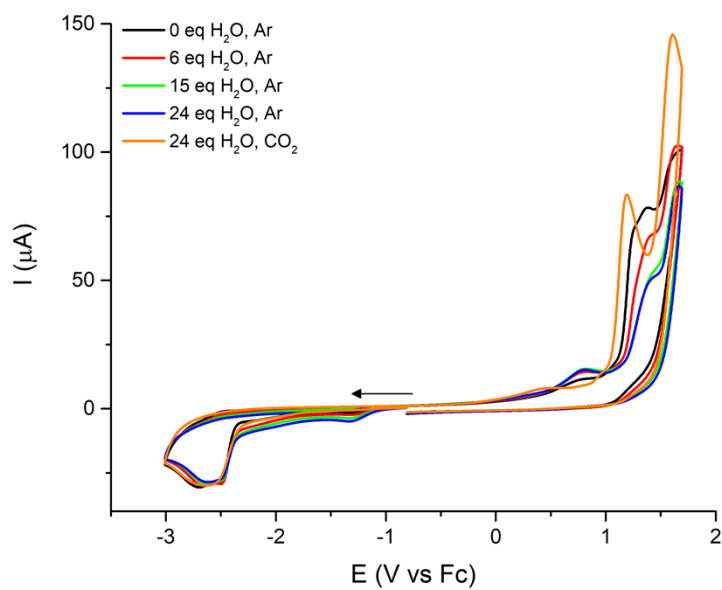

**Figure 14S** Cyclic voltammetry of  $[\text{Cp}_2\text{ZrHCl}]$  with AcOH

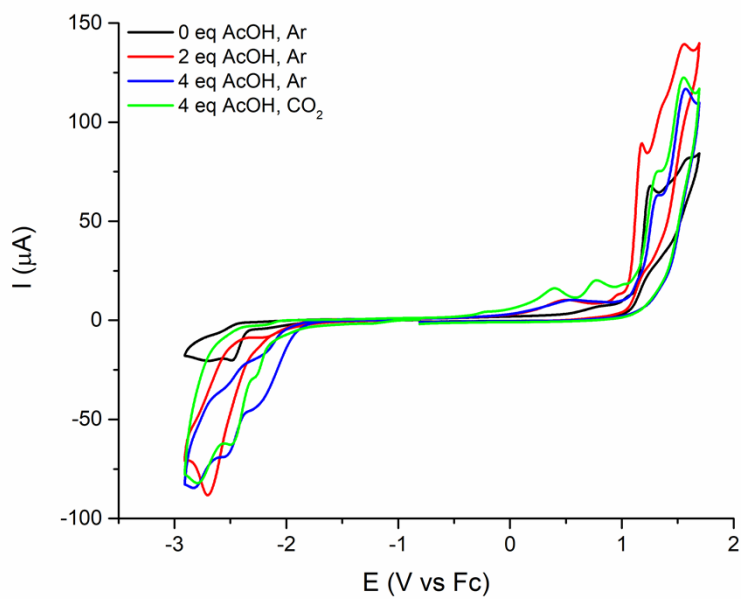

**Figure 15S.** FTIR resulting from the reaction of Wilkinson's reagent with the outlet gas of the chronoamperometry.

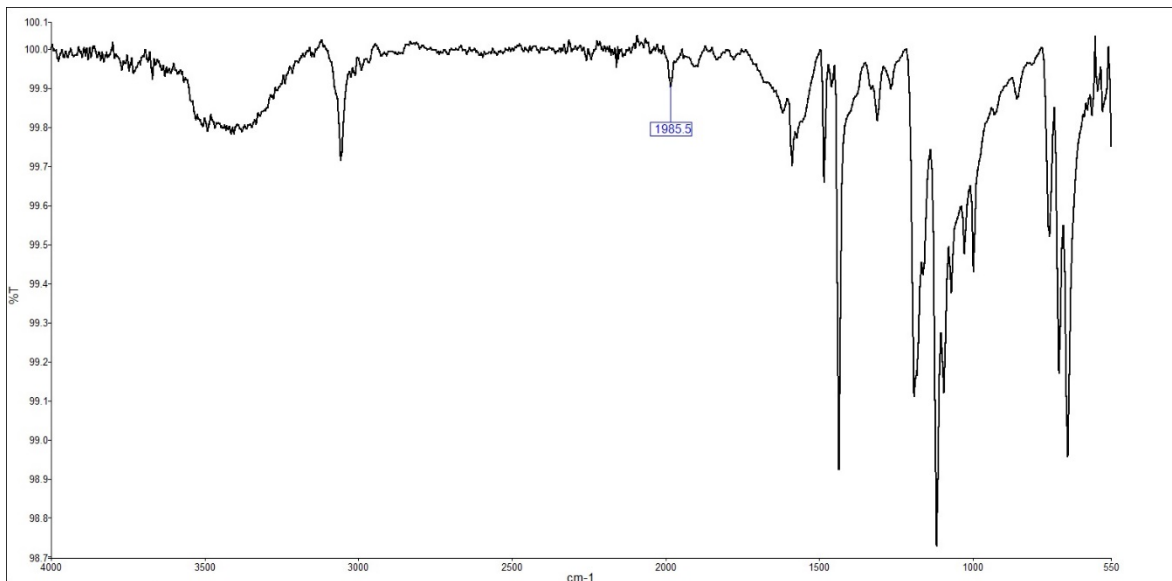



## Calculation of Faradic Efficiency

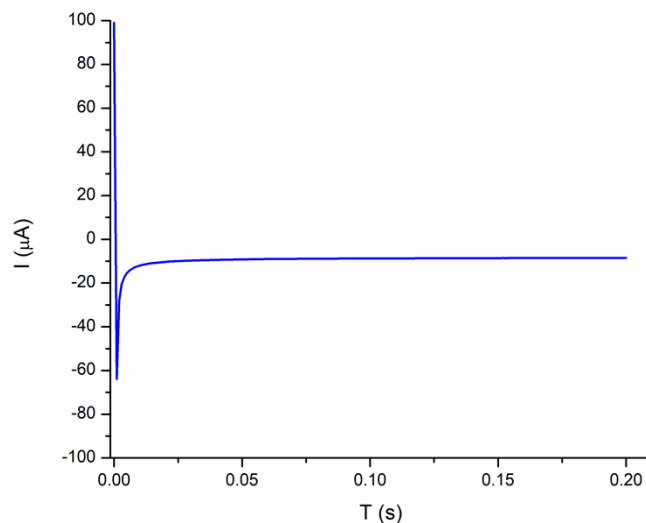

An approximate calculation of the faradaic efficiency (FE) was made with the data obtained from chronoamperometry (equation 1).<sup>1</sup> The estimated proportion of Wilkinson's catalyst containing CO was 6.7%.

$$FE (\%) = \frac{(n_{pro} \times n_e^{CO} \times F)}{Q} \quad \text{Ec. 1}$$

Where  $n_{pro}$  are the moles of product,  $n_e^{CO}$  is the number of electrons for CO, F is a constant (96485 C mol<sup>-1</sup>) and Q is the total charge that passes during electrolysis.

$$J(mA * cm^{-2}) = \frac{I}{A} \quad \text{Ec. 2}$$

$$J = -2.13 mA * cm^{-2}$$

Where  $I = -0.064$  mA, this was a value at the start of chronoamperometry,  $A = 0.03$  cm<sup>2</sup> at -2.8 V.

Being  $FE_{CO} = 8.3\%$ , with current density  $J = -2.13$  mA cm<sup>2</sup> at -2.8 V. It is estimated that the calculated FE is below the real value of the process, due to the limitations of the CO

quantification method. Likewise, the amount of H<sub>2</sub> generated is currently unknown, so selectivity data is not included.

## References

- (1) N. Eliaz, E. Gileadi, Physical Electrochemistry – Fundamentals, Techniques, and Applications, 2nd Edition, Wiley-VCH, 2019

**Figure 16S. GC for the reaction mixture of chronoamperometry with PhCO<sub>2</sub>H**

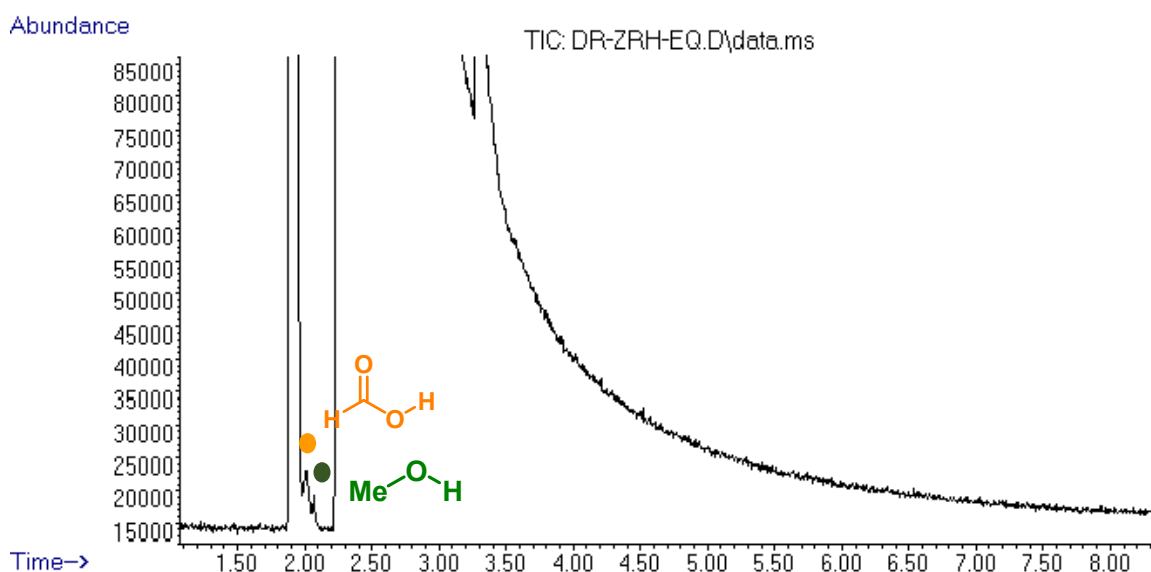

**Figure 17S. MS for Formic Acid**

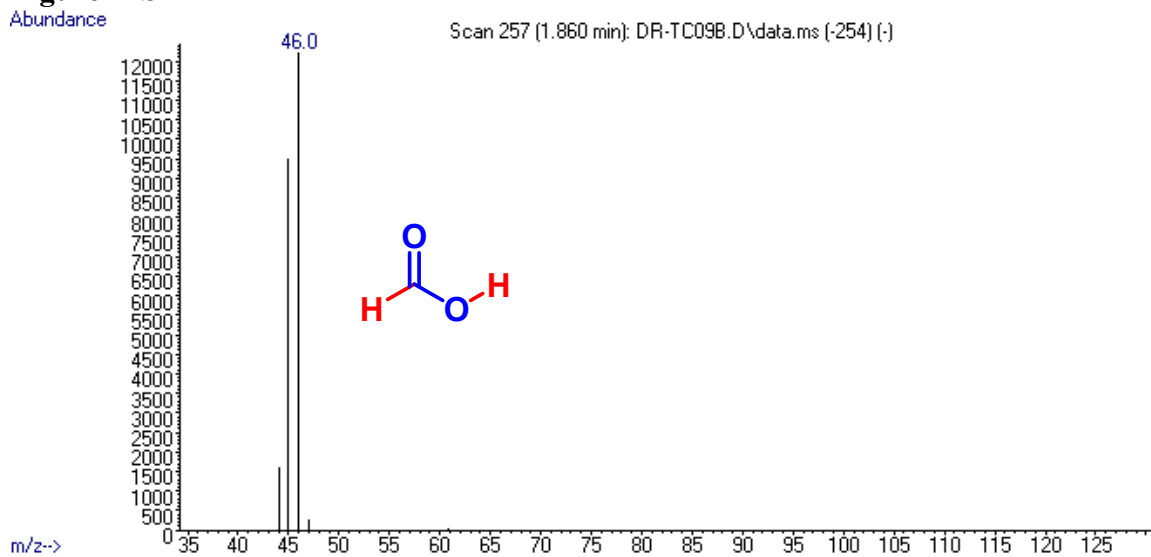

**Figure 18S.** Full spectrum of  $^1\text{H}$ -NMR of the reaction of  $\text{CO}_2$  with  $[\text{Cp}_2\text{ZrHCl}]$

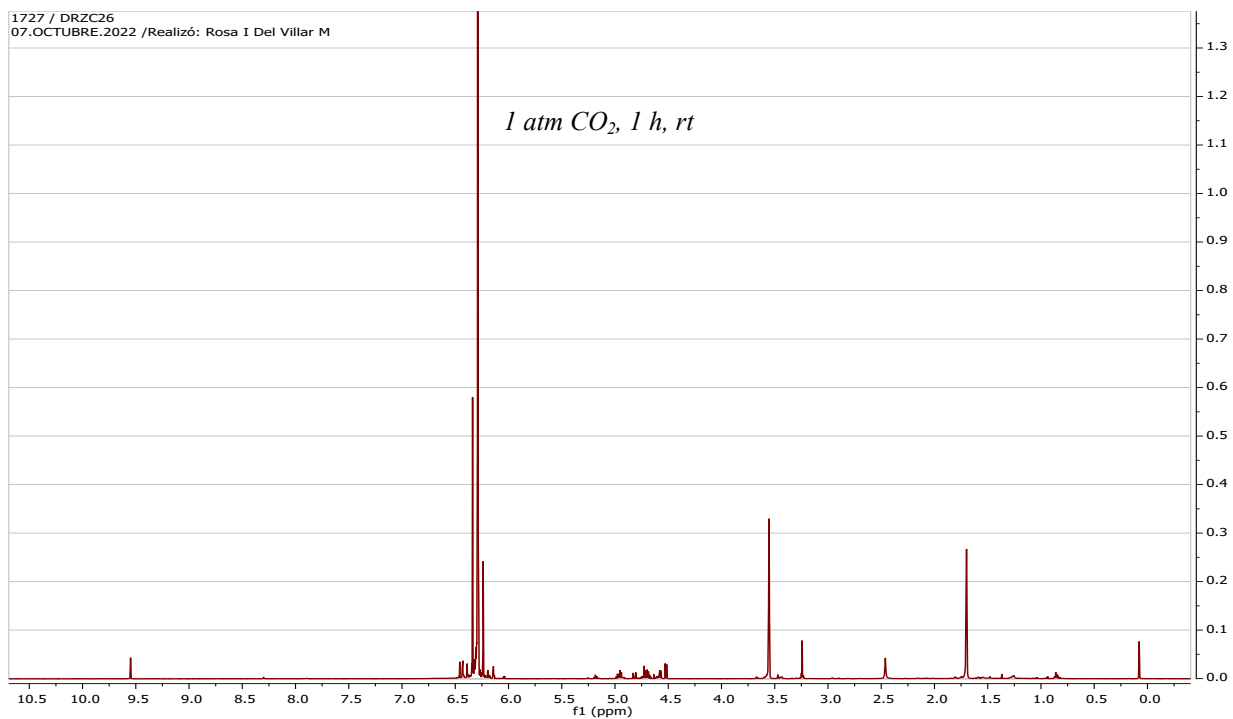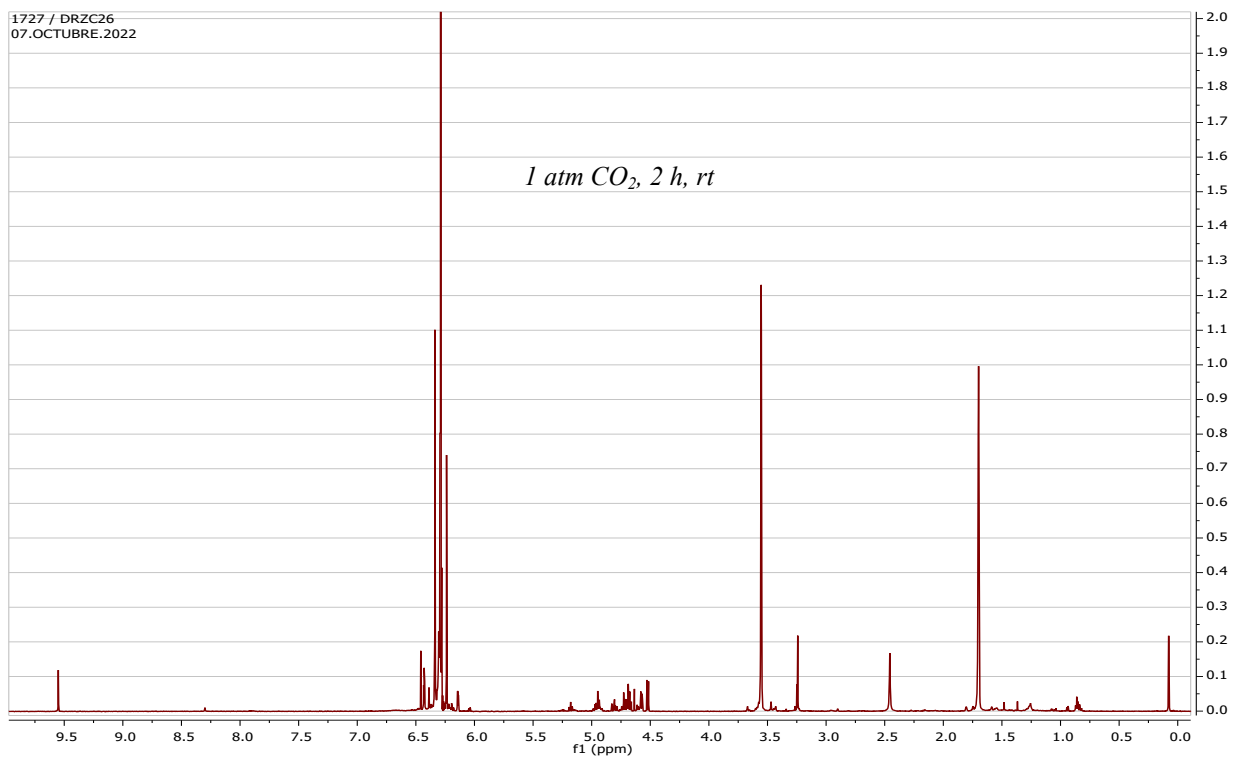

**Figure 19S.** Electrochemical control experiments in absence of  $[\text{Cp}_2\text{ZrHCl}]$

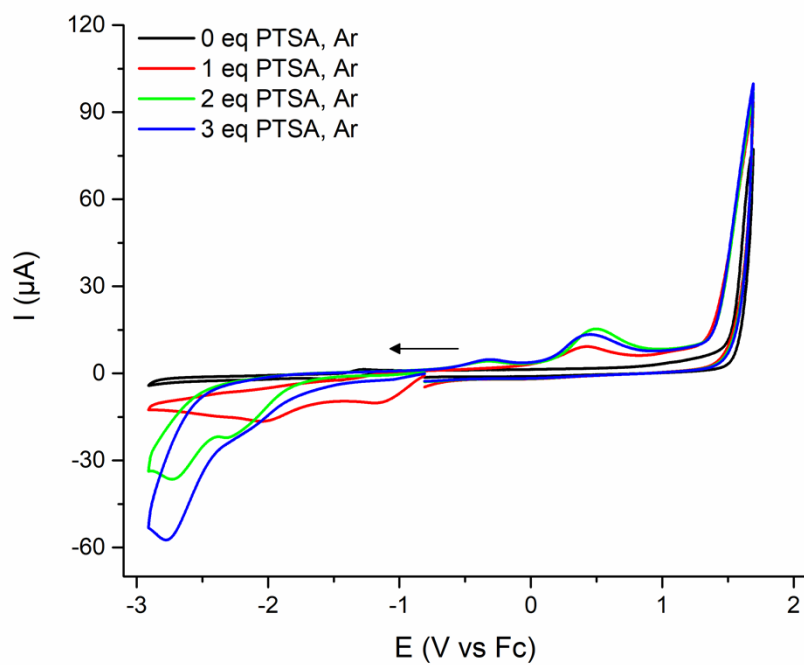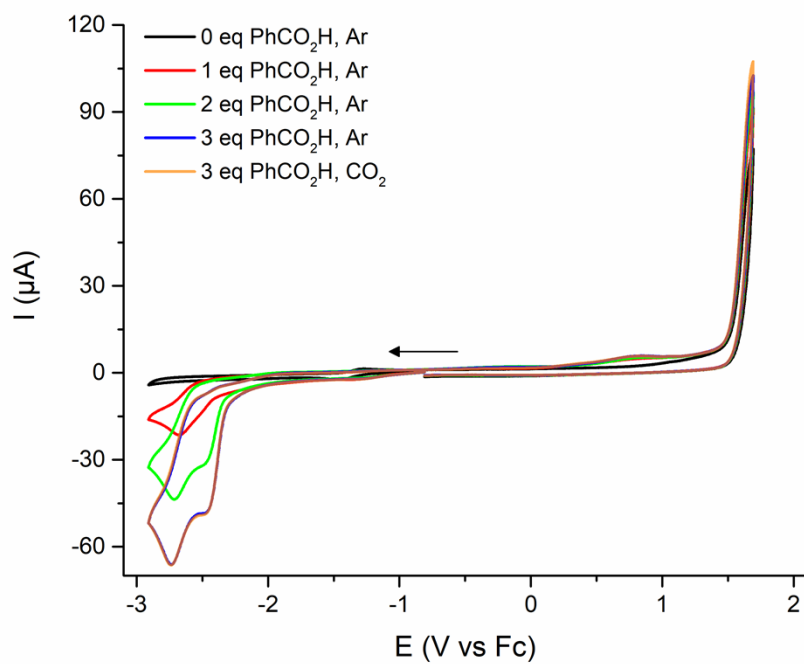

Supplement: d2nj06204f1.pdf [file d2nj06204f1.pdf]
